# Supplementary material for: Transmembrane Chemical Absorption Process for Recovering Ammonia as an Organic Fertilizer Using Citric Acid as the Trapping Solution
Source: MDPI journal article supplement (doi:10.3390/membranes14050102), 2024-04-29
Supplement: s1 [file s1]

# Transmembrane Chemical Absorption Process for Recovering Ammonia as an Organic Fertilizer Using Citric Acid as the Trapping Solution (Supplementary Information)

Ricardo Reyes Alva, Marius Mohr, and Susanne Zibek

**Table S1.** Ammonia distribution in the studied TMCA system configuration using sulfuric and citric acid as capturing solutions under different operational conditions

| TS                                           | pH   | T     | TAN <sub>o</sub> [mg] | Avg. TAN <sub>o</sub> [mg] | TAN <sub>f</sub> [mg] | Avg. TAN <sub>f</sub> | TAN <sub>p</sub> [mg] | Avg. Tan <sub>p</sub> [mg] |
|----------------------------------------------|------|-------|-----------------------|----------------------------|-----------------------|-----------------------|-----------------------|----------------------------|
| C <sub>6</sub> H <sub>8</sub> O <sub>7</sub> | 10   | 22 °C | 447,8                 | 447,8                      | 30,9                  | 30,9                  | 287,3                 | 287,3                      |
|                                              |      | 40 °C | 441,4                 | 441                        | 6,1                   | 3,7                   | 336,9                 | 334,1                      |
|                                              |      |       | 441                   |                            | 1,2                   |                       | 331,2                 |                            |
| H <sub>2</sub> SO <sub>4</sub>               | 10   | 22 °C | 445,4                 | 445,4                      | 11,7                  | 11,7                  | 359,4                 | 359,4                      |
|                                              |      | 40 °C | 437,4                 | 437                        | 1,5                   | 1,5                   | 427,7                 | 403,8                      |
|                                              |      |       | 436,6                 |                            | 1,5                   |                       | 379,9                 |                            |
| C <sub>6</sub> H <sub>8</sub> O <sub>7</sub> | 10,5 | 22 °C | 435,0                 | 435                        | 22,2                  | 22,2                  | 351,3                 | 351,3                      |
|                                              |      | 40 °C | 436,6                 | 435,8                      | 0,8                   | 1,1                   | 320,3                 | 344,0                      |
|                                              |      |       | 435,0                 |                            | 1,3                   |                       | 367,7                 |                            |
| H <sub>2</sub> SO <sub>4</sub>               | 10,5 | 22 °C | 430,2                 | 430,2                      | 15,1                  | 15,1                  | 371,4                 | 371,5                      |
|                                              |      | 40 °C | 439,8                 | 435                        | 1,4                   | 1,3                   | 358,1                 | 386,3                      |
|                                              |      |       | 430,2                 |                            | 1,0                   |                       | 414,4                 |                            |

**Table S2.** Ammonia mass transfer in the studied TMCA system configuration using sulfuric and citric acid as capturing solutions under different operational conditions

|                                              | pH   | T     | J <sub>NH<sub>3</sub>, rem.</sub> [g·m <sup>-2</sup> ·d <sup>-1</sup> ] | Avg. J <sub>NH<sub>3</sub>, rem.</sub> [g·m <sup>-2</sup> ·d <sup>-1</sup> ] | J <sub>NH<sub>3</sub>, p</sub> [g·m <sup>-2</sup> ·d <sup>-1</sup> ] | Avg. J <sub>NH<sub>3</sub>, p</sub> [g·m <sup>-2</sup> ·d <sup>-1</sup> ] | NaOH [mL] | Avg. NaOH [mL] |
|----------------------------------------------|------|-------|-------------------------------------------------------------------------|------------------------------------------------------------------------------|----------------------------------------------------------------------|---------------------------------------------------------------------------|-----------|----------------|
| C <sub>6</sub> H <sub>8</sub> O <sub>7</sub> | 10   | 22 °C | 21,4                                                                    | 21,4                                                                         | 4,0                                                                  | 4,0                                                                       | 6,4       | 8,01           |
|                                              |      | 40 °C | 22,4                                                                    | 22,5                                                                         | 4,7                                                                  | 4,6                                                                       | 7,2       |                |
|                                              |      |       | 22,6                                                                    |                                                                              | 4,6                                                                  |                                                                           | 7,0       |                |
| H <sub>2</sub> SO <sub>4</sub>               | 10   | 22 °C | 21,6                                                                    | 21,6                                                                         | 5,0                                                                  | 5,0                                                                       | 8,0       |                |
|                                              |      | 40 °C | 22,4                                                                    | 22,4                                                                         | 5,3                                                                  | 5,2                                                                       | 9,2       |                |
|                                              |      |       | 22,4                                                                    |                                                                              | 5,2                                                                  |                                                                           | 10,3      |                |
| C <sub>6</sub> H <sub>8</sub> O <sub>7</sub> | 10,5 | 22 °C | 21,7                                                                    | 21,7                                                                         | 4,9                                                                  | 4,9                                                                       | 9,2       | 10,19          |
|                                              |      | 40 °C | 22,4                                                                    | 22,3                                                                         | 4,4                                                                  | 4,8                                                                       | 9,3       |                |
|                                              |      |       | 22,3                                                                    |                                                                              | 5,1                                                                  |                                                                           | 9,7       |                |
| H <sub>2</sub> SO <sub>4</sub>               | 10,5 | 22 °C | 21,3                                                                    | 21,3                                                                         | 5,1                                                                  | 5,1                                                                       | 12,2      |                |
|                                              |      | 40 °C | 22,5                                                                    | 22,3                                                                         | 5,0                                                                  | 5,3                                                                       | 11,3      |                |
|                                              |      |       | 22,1                                                                    |                                                                              | 5,7                                                                  |                                                                           | 9,5       |                |

Table S3. Operational expenses estimations

| Pretreatment                                                 |                                                  |        |                     |           |
|--------------------------------------------------------------|--------------------------------------------------|--------|---------------------|-----------|
| Parameter                                                    | Unit                                             | Value  | Value per kg of TAN | Reference |
| <b>Membrane</b>                                              |                                                  |        |                     |           |
| Membrane flux                                                | $\text{L}\cdot\text{m}^{-2}\cdot\text{h}^{-1}$   | 25     |                     |           |
| Membrane area                                                | $\text{m}^2$                                     | 60     | 2,9                 |           |
| <b>Pump</b>                                                  |                                                  |        |                     |           |
| Head*                                                        | bar                                              | 5      |                     |           |
| Nominal power                                                | kW                                               | 8,25   |                     |           |
| Operational level                                            | % full capacity                                  | 80     |                     |           |
| Operational time                                             | $\text{h}\cdot\text{d}^{-1}$                     | 24     |                     |           |
| Pump energy consumption                                      | $\text{kWh}\cdot\text{d}^{-1}$                   | 158,4  | 7,5                 |           |
| Energy price                                                 | $\text{€}\cdot\text{kWh}^{-1}$                   | 0,3306 |                     | [1]       |
| Energy cost                                                  | $\text{€}\cdot\text{d}^{-1}$                     | 52,4   | 2,5                 |           |
| TMCA                                                         |                                                  |        |                     |           |
| Parameter                                                    | Unit                                             | Value  | Value per kg of N   | Reference |
| <b>Circulation pump</b>                                      |                                                  |        |                     |           |
| Nominal power                                                | kW                                               | 2,2    |                     |           |
| Operational level                                            | % full capacity                                  | 85     |                     |           |
| Operational time                                             | $\text{h}\cdot\text{d}^{-1}$                     | 24     |                     |           |
| Pump energy consumption                                      | $\text{kWh}\cdot\text{d}^{-1}$                   | 44,88  | 2,14                |           |
| Energy price                                                 | $\text{€}\cdot\text{kWh}^{-1}$                   | 0,3306 |                     | [1]       |
| Energy cost                                                  | $\text{€}\cdot\text{d}^{-1}$                     | 14,8   | 0,7                 |           |
| <b>Chemical consumption</b>                                  |                                                  |        |                     |           |
| NaOH 30% price                                               | $\text{€}\cdot\text{kg}^{-1}$                    | 0,77   |                     | [2]       |
| NaOH 30% density                                             | $\text{kg}\cdot\text{L}^{-1}$                    | 1,36   |                     |           |
| NaOH 30% requirement                                         | $\text{L}\cdot\text{m}^{-3}$                     | 8,01   | 0,38                |           |
|                                                              | $\text{kg}\cdot\text{m}^{-3}$                    | 10,9   | 0,52                |           |
|                                                              | $\text{kg}\cdot\text{d}^{-1}$                    | 381,3  | 18,16               |           |
| NaOH cost                                                    | $\text{€}\cdot\text{d}^{-1}$                     | 293,6  | 14,0                |           |
| H <sub>2</sub> SO <sub>4</sub> 50% price                     | $\text{€}\cdot\text{kg}^{-1}$                    | 0,48   |                     | [3]       |
| H <sub>2</sub> SO <sub>4</sub> 50% consumption               | H <sub>2</sub> SO <sub>4</sub> :TAN <sub>r</sub> | 3,5    |                     | [4]       |
|                                                              | $\text{kg}\cdot\text{d}^{-1}$                    | 73,5   |                     |           |
| H <sub>2</sub> SO <sub>4</sub> cost                          | $\text{€}\cdot\text{d}^{-1}$                     | 35,3   | 1,7                 |           |
| C <sub>6</sub> H <sub>8</sub> O <sub>7</sub> 50% price       | $\text{€}\cdot\text{kg}^{-1}$                    | 1,08   |                     | [5]       |
| C <sub>6</sub> H <sub>8</sub> O <sub>7</sub> 50% consumption | $\text{kg}\cdot\text{d}^{-1}$                    | 147    | 7                   | [5]       |
| C <sub>6</sub> H <sub>8</sub> O <sub>7</sub> cost            | $\text{€}\cdot\text{d}^{-1}$                     | 158,8  | 7,6                 |           |

| <b>Sales</b>                                           |                         |              |            |     |
|--------------------------------------------------------|-------------------------|--------------|------------|-----|
| <b>H<sub>2</sub>SO<sub>4</sub></b>                     |                         |              |            |     |
| Recovery efficiency                                    | %                       | 86,5         |            |     |
| Recovered TAN                                          | kg·d <sup>-1</sup>      | 18,2         |            |     |
| Ammonium sulfate produced                              | kg·d <sup>-1</sup>      | 70,5         |            |     |
| Ammonium sulfate price                                 | €·kg <sup>-1</sup>      | 0,43         |            | [6] |
| <b>H<sub>2</sub>SO<sub>4</sub> sales</b>               | <b>€·d<sup>-1</sup></b> | <b>30,3</b>  | <b>1,4</b> |     |
| <b>C<sub>6</sub>H<sub>8</sub>O<sub>7</sub></b>         |                         |              |            |     |
| Recovery efficiency                                    | %                       | 75,8         |            |     |
| Recovered TAN                                          | kg·d <sup>-1</sup>      | 15,9         |            |     |
| Ammonium citrate production                            | kg·d <sup>-1</sup>      | 195,70       |            |     |
| C <sub>6</sub> H <sub>11</sub> NO <sub>7</sub> price   | €·kg <sup>-1</sup>      | 1,06         |            | [5] |
| <b>C<sub>6</sub>H<sub>11</sub>NO<sub>7</sub> sales</b> | <b>€·d<sup>-1</sup></b> | <b>207,4</b> | <b>9,9</b> |     |

## References

- [1] Statista, Strompreise für industrie und Gewerbe seit 2006, Available online at: <https://de.statista.com/statistik/daten/studie/154902/umfrage/strompreise-fuer-industrie-und-gewerbe-seit-2006/>
- [2] Chemieshop 24, Natronlauge 30%, Available online at: <https://www.chemieshop24.de/natronlauge-30-en896-1200kg-container/1002796701000>
- [3] Chemieshop 24, Schwefelsäure 50%, Available online at: <https://www.chemieshop24.de/schwefelsaeure-50-en899-1300kg-container/1000419201004>
- [4] Noriega-Hevia, G.; Serralta, J.; Seco, A.; Ferrer, J. Economic analysis of the scale-up and implantation of a hollow fibre membrane contactor plant for nitrogen recovery in a full-scale wastewater treatment plant. *Separation and Purification Technology* **2021**, 275, 119128, doi:10.1016/j.seppur.2021.119128.
- [5] Soto-Herranz et al. Evaluation of Different Capture Solutions for Ammonia Recovery in Suspended Gas Permeable Membrane Systems. *Membranes (Basel)* **2022**, 12, doi:10.3390/membranes12060572.
- [6] Chemanalyst, Ammonium Sulphate Price Trend and Forecast, Available online at: <https://www.chemanalyst.com/Pricing-data/ammonium-sulphate-64#:~:text=In%20Q1%202023%2C%20the%20Ammonium,and%20a%20bearish%20demand%20outlook.>
